# Supplementary material for: Recombination between Homologous Chromosomes Induced by Unrepaired UV-Generated DNA Damage Requires Mus81p and Is Suppressed by Mms2p
Source: PLoS Genet. 2015 Mar 4;11(3):e1005026. doi: 10.1371/journal.pgen.1005026 (PMC4349867; doi:10.1371/journal.pgen.1005026)
Supplement: S1 Table — The depictions in this Fig are LOH patterns observed in red/white sectored colonies derived from the irradiated diploid PG311. The data are a sub-set of those previously described in Yin and Petes (2013). Following irradiation, the cells were grown at 300 in medium lacking canavanine. In these depictions, green, red, and black lines indicate heterozygosity, homozygosity for the W303–1A-derived SNPs, and homozygosity for the YJM789-derived SNPs. Each pair of lines represents the LOH patterns in the two sectors. The lower case letters above and below the paired lines represent the transitions between heterozygous and homozygous SNPs or between two different regions of homozygous SNPs. The SGD coordinates for each transition are in S2 Table. The thin red line for Class Q1 indicates that the red sector was monosomic, retaining the W303–1A-derived chromosome. The sizes of the gene conversion tracts are not drawn to scale. The numbers of events of each type are shown in the right hand column. The abbreviation "SCB" indicates that the LOH event likely reflects the repair of a single chromatid break, and "DSCB" indicates that the LOH event is a consequence of the repair of two sister chromatids broken at same position (Yin and Petes, 2013). For some chromosomes, widely-separated LOH events were observed (Class L and Class P). If the LOH events were separated by a distance greater than the median conversion tract length plus two median absolute deviation (calculated in R), they were treated as two events. Interpretation for the classification of events is in the S1 Text in Yin and Petes 2013. (XLS) [file pgen.1005026.s006.xls]

## Sheet: Table S1
Table S1. Classes of UV-induced LOH events (selected on chromosome V and unselected on other chromosomes) in twenty sectored colonies resulting from treating G1-synchronized wild-type cells with a UV dose of 15 J/m2
Class																											Number of events
Class A
			a		b
A1	1																										26
SCB
	2
A2	1																										30
SCB
	2
			a		b
Class B
			a		b
B1	1																										21
DSCB
	2
			a		b
			a		b
B2	1																										12
DSCB
	2
			a		b
Class C
			a				c
C1	1																										9
DSCB
	2
			a		b
			a		b
C2	1																										6
DSCB
	2
			a				c
			a				c
C3	1																										7
DSCB
	2
					b		c
					b		c
C4	1																										4
DSCB
	2
			a				c
Class E
			a				c
E1	1																										4
DSCB
	2
					b				d
					b				d
E2	1																										2
DSCB
	2
			a				c
			a						d
E3	1																										3
DSCB
	2
					b		c
					b		c
E4	1																										1
DSCB
	2
			a						d
Class F
			a				c
F1	1																										1
SCB				14k
	2
			a		b
			a		b		c		d
F6	1																										1
DSCB
	2
							c		d
			a		b		c		d
F9	1																										1
DSCB
	2
			a						d
Class G
			a		b
G1	1																										1
SCB
	2
					b		c
			a		b		c		d
G3	1																										1
SCB
	2
					b						e
G5	1																										1
SCB
	2
			a		b		c		d
			a		b		c
G6	1																										1
DSCB
	2
					b		c
			a		b		c
G7	1																										1
DSCB
	2
			a		b
Class H
			a
H1	1																										6
Simple CO
	2
			a
			a
H2	1																										1
Simple CO
	2
			a
					b
H3	1																										4
SCB
	2
			a
			a
H4	1																										8
SCB
	2
					b
			a
H5	1																										5
SCB
	2
					b
					b
H6	1																										4
SCB
	2
			a
Class I
			a		b
I1	1																										2
DSCB
	2
					b
			a		b
I2	1																										1
DSCB
	2
					b
			a
I5	1																										1
DSCB
	2
					b		c
			a		b
I6	1																										1
DSCB
	2
							c
							c
I7	1																										1
DSCB
	2
			a		b		c
			a		b		c
I9	1																										1
DSCB
	2
							c
			a		b		c
I10	1																										2
DSCB
	2
			a
					b
I11	1																										1
DSCB
	2
			a		b		c
			a		b		c
I12	1																										1
DSCB
	2
					b
			a		b				d
I14	1																										1
DSCB
	2
							c
			a				c		d
I15	1																										1
DSCB
	2
					b
									d
I16	1																										1
DSCB
	2
			a		b		c
					b		c		d
I19	1																										1
DSCB
	2
			a
Class J
			a
J1	1																										1
DSCB
	2
			a		b
					b
J2	1																										1
DSCB
	2
			a		b
			a		b		c
J5	1																										1
DSCB
	2
			a
			a
J6	1																										1
DSCB
	2
			a		b		c
					b		c		d
J7	1																										1
DSCB
	2
			a		b				d
			a				c		d
J8	1																										1
DSCB
	2
			a		b		c
			a
J9	1																										1
SCB
	2
			a		b		c		d		e
			a		b		c		d		e
J11	1																										1
DSCB
	2
							c
			a		b		c		d		e
J13	1																										1
DSCB
	2
											e
			a		b		c		d		e
J14	1																										1
DSCB
	2
							c		d		e
													f
J16	1																										1
DSCB
	2
			a		b		c		d		e		f
Class K
					b
K1	1																										1
SCB
	2
			a		b		c
			a		b		c
K3	1																										1
DSCB
	2
					b				d
Class L
														f
L3	1																										1
DSCB								25 kb
DSCB	2
			a		b		c			d		e
			a									e		f		g		h
L6	1																										1
SCB										92 kb
DSCB	2
					b		c		d
									d		e		f			g		h
L7	1																										1
DSCB														272 kb
SCB	2
			a		b		c
										d
L8	1																										1
DSCB						139 kb
SCB	2
			a		b			c		d		e
			a		b					d
L9	1																										1
SCB						422k
SCB	2
								c		d		e
			a		b		c					e		f
L10	1																										1
DSCB										62 kb
DSCB	2
			a		b				d
			a											f
L12	1																										1
DSCB										47 kb
DSCB	2
					b		c		d			e		f		g
			a		b		c			d		e
L13	1																										1
DSCB								184 kb
DSCB	2
			a		b		c					e
			a		b				d			e						h
L14	1																										1
DSCB										337 kb
DSCB	2
			a		b		c							f		g				i
Class M
			a
M1	1																										1
SCB
	2
M3	1																										1
SCB
	2
			a
			a
M5	1																										1
DSCB
	2
			a
			a
M6	1																										2
DSCB
	2
			a
			a
M7	1																										1
DSCB
	2
					b
			a				c
M8	1																										1
DSCB
	2
					b
Class N
			a		b		c		d
N1	1																										1
DSCB
	2
			a
Class P
									c
P1	1																										1
SCB		71 kb					61 kb
	2
				a		b
			a						b		c
P3	1																										1
SCB				500 kb with rDNA								218 kb
	2
Class Q
Q1	1																										1
	2
			a		b
The depictions in this figure are LOH patterns observed in red/white sectored colonies derived from the irradiated diploid PG311. The data are a sub-set of those previously described in Yin and Petes (2013). Following irradiation, the cells were grown at 300 in medium lacking canavanine. In these depictions, green, red, and black lines indicate heterozygosity, homozygosity for the W303-1A-derived…
